# Supplementary material
Source: HighWire-hosted journal article supplement (http://www.cfp.ca/highwire/filestream/30247/field_highwire_adjunct_files/4/Soins_preventifs_Fiche_de_controle_Pour_la_femme.pdf)
Supplement: Soins_preventifs_Fiche_de_controle_Pour_la_femme.pdf [file Soins_preventifs_Fiche_de_controle_Pour_la_femme.pdf]

# Soins préventifs – Fiche de contrôle®

## Pour l'évaluation routinière de l'état de santé de la femme à risque moyen

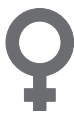

Élaboré par: Dre V. Dubey, Dr R. Mathew, Dr K. Iglar

### Veillez prendre note:

**Caractères gras** = Preuves de bonne qualité (selon le Groupe d'étude canadien sur les soins de santé préventives)  
*Italique* = Preuves passables (selon le Groupe d'étude canadien sur les soins de santé préventives)  
 Texte régulier = lignes directrices d'autres sources canadiennes  
 (Voir l'encadré pour références et le texte encadré pour explications)

Nom:

Sexe:

DDN:

Âge:

Carte santé:

Tél:

Adresse:

Date:

### Préoccupations actuelles

### Mode de vie/Habitudes

Diète: *Gras / Cholestérol*  
 Fibres  
*Calcium*  
 Sodium

Tabagisme:  
 Alcool:  
 Drogues:

Exercice: *Histoire de la Sexualité:*  
 Travail: Planification Familiale/  
 Contraception:  
 Famille: Sommeil:  
 Relations:

### Mise à jour du profil cumulatif de la patiente

Antécédents familiaux  Médicaments  
 Hospitalisations/Chirurgies  Allergies

### Revue fonctionnelle des systèmes

|                        | Normal                   | Remarques |
|------------------------|--------------------------|-----------|
| TÊTE ORLO:             | <input type="checkbox"/> |           |
| CV:                    | <input type="checkbox"/> |           |
| Resp:                  | <input type="checkbox"/> |           |
| Seins:                 | <input type="checkbox"/> |           |
| GI:                    | <input type="checkbox"/> |           |
| GU/Mens-<br>truations: | <input type="checkbox"/> |           |

|                     | Normal                   | Remarques                                                                                    |
|---------------------|--------------------------|----------------------------------------------------------------------------------------------|
| Fonction Sexuelle:  | <input type="checkbox"/> |                                                                                              |
| Musc-squel:         | <input type="checkbox"/> |                                                                                              |
| Neuro:              | <input type="checkbox"/> |                                                                                              |
| Dermato:            | <input type="checkbox"/> |                                                                                              |
| Santé Mentale       | <input type="checkbox"/> | Dépistage de la dépression <input type="checkbox"/> positif <input type="checkbox"/> négatif |
| Constitu-tional SX: | <input type="checkbox"/> |                                                                                              |

|                           |                                                                                                                                                                                                                                                                                                                                                                                                                                                                                                                                                                                                                                                                                                                                                                                                                 |                                                                                                                                                                                                                                                               |                                                                                                                                                                                                                                                                                                                                                                                   |
|---------------------------|-----------------------------------------------------------------------------------------------------------------------------------------------------------------------------------------------------------------------------------------------------------------------------------------------------------------------------------------------------------------------------------------------------------------------------------------------------------------------------------------------------------------------------------------------------------------------------------------------------------------------------------------------------------------------------------------------------------------------------------------------------------------------------------------------------------------|---------------------------------------------------------------------------------------------------------------------------------------------------------------------------------------------------------------------------------------------------------------|-----------------------------------------------------------------------------------------------------------------------------------------------------------------------------------------------------------------------------------------------------------------------------------------------------------------------------------------------------------------------------------|
| Éducation/<br>Counselling | <b>Comportement</b><br><input type="checkbox"/> <b>acide folique</b> (0,4-0,8 mg/jour, pour les femmes enceintes)<br><input type="checkbox"/> <i>mauvaises habitudes alimentaires</i><br><input type="checkbox"/> <i>apport calcique adéquat (1000 à 1500 mg/jour)<sup>1</sup></i><br><input type="checkbox"/> <i>apport adéquat de vitamine D (200 UI chez les 50-64, 400-800 UI chez les ≥ 65 ans)<sup>1</sup></i><br><input type="checkbox"/> <i>activité physique modérée régulière</i><br><input type="checkbox"/> <i>counseling en matière de poids, s'il y a excès de poids</i><br><input type="checkbox"/> <i>éviter l'exposition au soleil, utiliser des vêtements de protection</i><br><input type="checkbox"/> <i>sexualité sans risques/counseling ITS (infections transmissibles sexuellement)</i> | <b>Alcool</b> <input type="checkbox"/> Oui <input type="checkbox"/> Non<br><input type="checkbox"/> <i>dépistage de l'abus d'alcool</i><br><input type="checkbox"/> <i>counseling pour l'abus d'alcool</i>                                                    | <b>Sécurité personnelle</b><br><input type="checkbox"/> <b>protection de l'ouïe</b><br><input type="checkbox"/> <b>programmes de contrôle anti-bruit</b><br><input type="checkbox"/> <i>ceintures de sécurité</i>                                                                                                                                                                 |
|                           | <b>Tabagisme</b> <input type="checkbox"/> Oui <input type="checkbox"/> Non<br><input type="checkbox"/> <b>cessation du tabagisme</b><br><input type="checkbox"/> <b>substitution de nicotine</b><br><input type="checkbox"/> <i>conseils diététiques sur la consommation de fruits et de légumes verts feuillus</i><br><input type="checkbox"/> <i>orientation vers un programme validé de cessation du tabagisme</i>                                                                                                                                                                                                                                                                                                                                                                                           | <b>Personne âgée</b> <input type="checkbox"/> Oui <input type="checkbox"/> Non<br><input type="checkbox"/> <i>évaluation des fonctions cognitives (si préoccupations)</i><br><input type="checkbox"/> <i>évaluation des chutes (si antécédents de chutes)</i> | <b>Parents avec enfants</b> <input type="checkbox"/> Oui <input type="checkbox"/> Non<br><input type="checkbox"/> <i>contrôle des poisons préventifs</i><br><input type="checkbox"/> <i>détecteurs de fumée</i><br><input type="checkbox"/> <i>vêtements de nuit ininflammables</i><br><input type="checkbox"/> <i>réglage du thermostat du réservoir d'eau chaude (&lt;54°C)</i> |

**Avertissement:** Ce formulaire est un guide pour l'examen médical périodique de l'adulte. La dernière mise remonte à janvier 2007. Les recommandations s'appliquent aux adultes à risque moyen.

Endossé par:

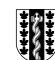

The College of Family Physicians of Canada

Le Collège des médecins de famille du Canada

**Veillez prendre note:**

**Caractères gras** = Preuves de bonne qualité (selon le Groupe d'étude canadien sur les soins de santé préventives)  
*Italique* = Preuves passables (selon le Groupe d'étude canadien sur les soins de santé préventives)  
 Texte régulier = lignes directrices d'autres sources canadiennes

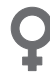

Nom: \_\_\_\_\_

**Examen physique**

POULS: TA: RR: Taille: Poids: IMC: Tour de taille: \_\_\_\_\_ Rapport:  
 Tour de hanches: \_\_\_\_\_

Yeux: *Échelle de vision de Snellen: D*  
 G

**Seins:**

Nez: \_\_\_\_\_

Abdo:

Oreilles: *Test de la voix chuchotée: D*  
 G

Anus-Rectum:

Bouche/Gorge: Pelvis:  *Pap*

Neuro:

Cou/Thyroïde:

Dermato:

CV:

Musc-squel/Articulations:

Resp:

Extrémités:

| Âge                 | 21- 64 ans                                                                                                                                                                                                                                                                                                                                                                                                                                                                                                                                                                                                                                                                                                                                                                                                                          | ≥ 65 ans                                                                                                                                                                                                                                                                                                                                                                                                                                                                                                                                                                                                                       |
|---------------------|-------------------------------------------------------------------------------------------------------------------------------------------------------------------------------------------------------------------------------------------------------------------------------------------------------------------------------------------------------------------------------------------------------------------------------------------------------------------------------------------------------------------------------------------------------------------------------------------------------------------------------------------------------------------------------------------------------------------------------------------------------------------------------------------------------------------------------------|--------------------------------------------------------------------------------------------------------------------------------------------------------------------------------------------------------------------------------------------------------------------------------------------------------------------------------------------------------------------------------------------------------------------------------------------------------------------------------------------------------------------------------------------------------------------------------------------------------------------------------|
| Labo/Investigations | <input type="checkbox"/> <b>Mammographie</b> (50-69 ans, q1-2 ans; considéré si 40- 49 ans)<br><input type="checkbox"/> <b>Hemoccult multiphase q1-2 years</b> (âge ≥ 50)<br>OU <input type="checkbox"/> <i>Sigmoidoscopy</i> OU <input type="checkbox"/> Coloscopie<br><input type="checkbox"/> <i>Cytologie du col q1-3 ans</i> (si active sexuellement, jusqu'à l'âge de 69 ans)<br><input type="checkbox"/> <b>Dépistage de la gonorrhée/du Chlamydia/et de la syphilis/VIH/VHB<sup>5</sup></b> (haut risque)<br><input type="checkbox"/> Lipidogramme à jeun (≥ 50 ans ou durant la ménopause ou avant si à risque) <sup>2</sup><br><input type="checkbox"/> <i>Glycémie à jeun, au moins q3 ans (≥ 40 an ou avant si à risque)</i> <sup>3</sup><br><input type="checkbox"/> Densité minérale osseuse si à risque <sup>1</sup> | <input type="checkbox"/> <b>Mammographie</b> (jusqu'à l'âge de 69; q1-2 ans)<br><input type="checkbox"/> <b>Hemoccult Multiphase q1-2 years</b><br>OU <input type="checkbox"/> <i>Sigmoidoscopy</i> OU <input type="checkbox"/> Coloscopie<br><input type="checkbox"/> <i>Audioscope (ou s'informer/test de la voix chuchotée)</i><br><input type="checkbox"/> Lipidogramme à jeun <sup>2</sup><br><input type="checkbox"/> <i>Glycémie à jeun, au moins q3 ans (plus souvent si à risque)</i> <sup>3</sup><br><input type="checkbox"/> <i>Densité minérale osseuse q1-2 ans si anormale, q2-3 ans si normale</i> <sup>1</sup> |
| Immunisations       | <input type="checkbox"/> <b>Vaccin antitétanique q10ans</b><br><input type="checkbox"/> <b>Vaccin contre l'influenza q1an</b><br><input type="checkbox"/> <i>Vaccin contre la rubéole</i> <input type="checkbox"/> <i>Immunité antirubéole</i><br><input type="checkbox"/> <i>Vaccin contre la varicelle (2 doses)</i> <input type="checkbox"/> <i>Immunité antivarielle</i><br><input type="checkbox"/> Vaccin antipneumococcique (haut risque) <sup>4</sup><br><input type="checkbox"/> Vaccin acellulaire contre la coqueluche <sup>4</sup><br><input type="checkbox"/> Vaccin contre le virus du papillome humain (3 doses) (9-26 ans) <sup>4</sup>                                                                                                                                                                             | <input type="checkbox"/> <b>Vaccin antitétanique q10ans</b><br><input type="checkbox"/> <b>Vaccin contre l'influenza q1an</b><br><input type="checkbox"/> <i>Varicella vaccine (2 doses)</i> <input type="checkbox"/> <i>Immunité antivarielle</i><br><input type="checkbox"/> Vaccin antipneumococcique (haut risque) <sup>4</sup><br><input type="checkbox"/> Vaccin acellulaire contre la coqueluche <sup>4</sup>                                                                                                                                                                                                           |

**Évaluations et plans:**

Date: \_\_\_\_\_

Signature: \_\_\_\_\_

**Références**

À moins d'avis contraire, les recommandations proviennent du Groupe d'étude canadien sur les soins de santé préventifs: Guide canadien de médecine clinique préventive. Ottawa: Ministre des Approvisionnements et Services Canada et <http://www.ctfphc.org/>  
 1. Comité scientifique consultatif, La Société de l'ostéoporose du Canada. Principes directeurs des activités cliniques pour la prise en charge de l'ostéoporose. JAMC 2002;167(10 suppl):S1-34.  
 2. Groupe de travail sur l'hypercholestérolémie et autres dyslipidémies. Recommandations pour la prise en charge et le traitement de la dyslipidémie. Can J Cardiol 2006;22(11) 913-927.  
 3. Section scientifique de l'Association canadienne du diabète. Lignes directrices 2003 pour le traitement du diabète au Canada. Can J Diabetes. 2003;27 (2 Suppl)  
 4. Comité consultatif national sur l'immunisation. Guide canadien d'immunisation, 7e édition. Ottawa: Ministre des Travaux publics et Services gouvernementaux Canada; 2006  
 5. Groupe de travail d'experts sur les lignes directrices canadiennes pour les infections transmissibles sexuellement. Lignes directrices canadiennes sur les infections transmissibles sexuellement, édition 2006. Ottawa : Agence de santé publique du Canada.

**Avertissement:** Ce formulaire est un guide pour l'examen médical périodique de l'adulte. La dernière mise remonte à janvier 2007. Les recommandations s'appliquent aux adultes à risque moyen.

Endossé par:



The College of Family Physicians of Canada

Le Collège des médecins de famille du Canada
